# Supplementary material for: The blockage of the Nogo/NgR signal pathway in microglia alleviates the formation of Aβ plaques and tau phosphorylation in APP/PS1 transgenic mice
Source: Springer Nature journal article supplement (doi:10.1186/s12974-016-0522-x), 2016-03-03

# Additional file 1: Figure S1

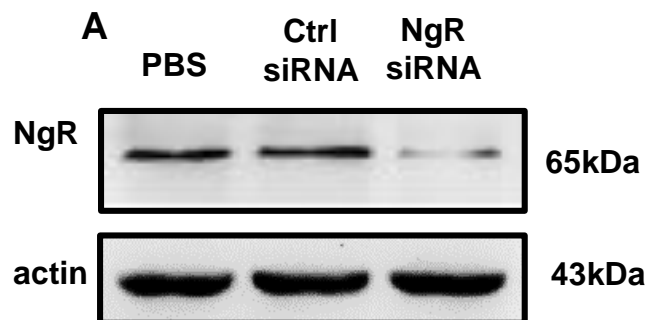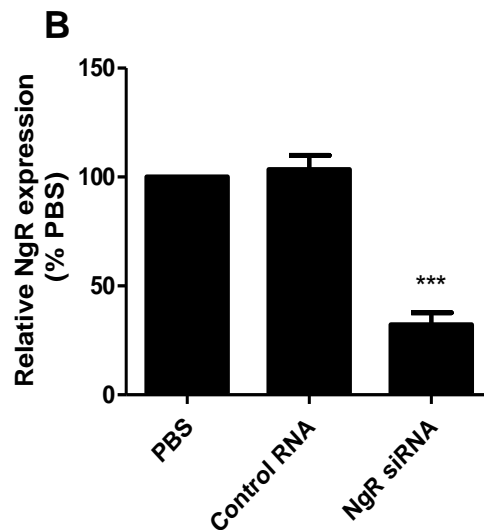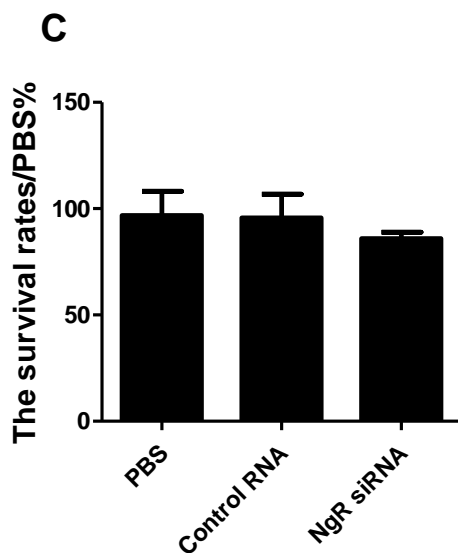

Supplement: MOESM1 [file 9769098]
